# Supplementary material
Source: publisher site journal article supplement (https://www.dovepress.com/article/578721)
Supplement: Supplementary file 1 [file 578721%20Supplementary%20Materials.docx]

**Appendix 1 The PRISMA 2020 reporting checklist**

|  | Item Description | Location (or reason for not reporting) |
| --- | --- | --- |
| **Title and Abstract** |  |  |
| [1. Title](https:/resources.equator-network.org/reporting-guidelines/prisma/items/title.html?utm_source=prisma&utm_medium=checklist&utm_campaign=1_1) | Identify the report as a systematic review. | Page1, Title page |
| [2. Abstract](https:/resources.equator-network.org/reporting-guidelines/prisma/items/abstract.html?utm_source=prisma&utm_medium=checklist&utm_campaign=1_1) | Include all items from the PRISMA 2020 for Abstracts checklist. | Page1-3, Abstract |
| **Introduction** |  |  |
| [3. Rationale](https:/resources.equator-network.org/reporting-guidelines/prisma/items/rationale.html?utm_source=prisma&utm_medium=checklist&utm_campaign=1_1) | Describe the rationale for the review in the context of existing knowledge. | Page 3-5, Introduction;  Paragraph1-5 |
| [4. Objectives](https:/resources.equator-network.org/reporting-guidelines/prisma/items/objectives.html?utm_source=prisma&utm_medium=checklist&utm_campaign=1_1) | Provide an explicit statement of the objective(s) or question(s) the review addresses. | Page3-5, Introduction;  Paragraph 6 |
| **Methods** |  |  |
| [5. Eligibility criteria](https:/resources.equator-network.org/reporting-guidelines/prisma/items/eligibility-criteria.html?utm_source=prisma&utm_medium=checklist&utm_campaign=1_1) | Specify the inclusion and exclusion criteria for the review and how studies were grouped for the syntheses. | Page 7, Materials and Methods, Eligibility Criteria;  Paragraph 2 |
| [6. Information sources](https:/resources.equator-network.org/reporting-guidelines/prisma/items/information-sources.html?utm_source=prisma&utm_medium=checklist&utm_campaign=1_1) | Specify all databases, registers, websites, organisations, reference lists and other sources searched or consulted to identify studies. Specify the date when each source was last searched or consulted. | Page 6, Materials and Methods, Search Strategy and Study Identification; Paragraph 1 |
| [7. Search](https:/resources.equator-network.org/reporting-guidelines/prisma/items/search.html?utm_source=prisma&utm_medium=checklist&utm_campaign=1_1) | Present the full search strategies for all databases, registers and websites, including any filters and limits used. | Supplementary Materials, Appendix Table 2 |
| [8. Selection Process](https:/resources.equator-network.org/reporting-guidelines/prisma/items/selection-process.html?utm_source=prisma&utm_medium=checklist&utm_campaign=1_1) | Specify the methods used to decide whether a study met the inclusion criteria of the review, including how many reviewers screened each record and each report retrieved, whether they worked independently, and, if applicable, details of automation tools used in the process. | Page 7-8, Materials and Methods, Study Selection;  Paragraph 1; |
| [9. Data collection process](https:/resources.equator-network.org/reporting-guidelines/prisma/items/data-collection-process.html?utm_source=prisma&utm_medium=checklist&utm_campaign=1_1) | Specify the methods used to collect data from reports, including how many reviewers collected data from each report, whether they worked independently, any processes for obtaining or confirming data from study investigators, and if applicable, details of automation tools used in the process. | Page8-9, Materials and Methods, Data Extraction;  Paragraph 1-2 |
| 10. Data Items |  |  |
| [10a. Outcomes](https:/resources.equator-network.org/reporting-guidelines/prisma/items/data-items-outcomes.html?utm_source=prisma&utm_medium=checklist&utm_campaign=1_1) | List and define all outcomes for which data were sought. Specify whether all results that were compatible with each outcome domain in each study were sought (e.g. for all measures, time points, analyses), and if not, the methods used to decide which results to collect. | Page 6-9;  Table 3,Table 4 |
| [10b. Other Variables](https:/resources.equator-network.org/reporting-guidelines/prisma/items/data-items-other-variables.html?utm_source=prisma&utm_medium=checklist&utm_campaign=1_1) | List and define all other variables for which data were sought (e.g. participant and intervention characteristics, funding sources). Describe any assumptions made about any missing or unclear information. | Page 6-9;  Table 1,Table 2;  Page 27, Funding |
| [11. Risk of bias in individual studies](https:/resources.equator-network.org/reporting-guidelines/prisma/items/risk-of-bias-in-individual-studies.html?utm_source=prisma&utm_medium=checklist&utm_campaign=1_1) | Specify the methods used to assess risk of bias in the included studies, including details of the tool(s) used, how many reviewers assessed each study and whether they worked independently, and if applicable, details of automation tools used in the process. | Page 9, Materials and Methods, Assessment of Methodological Quality;  Paragraph 1 |
| [12. Effect measures](https:/resources.equator-network.org/reporting-guidelines/prisma/items/effect-measures.html?utm_source=prisma&utm_medium=checklist&utm_campaign=1_1) | Specify for each outcome the effect measure(s) (e.g. risk ratio, mean difference) used in the synthesis or presentation of results. | NA |
| 13. Synthesis Methods |  |  |
| [13a. Deciding which studies were eligible for each synthesis](https:/resources.equator-network.org/reporting-guidelines/prisma/items/synthesis-methods-eligibility.html?utm_source=prisma&utm_medium=checklist&utm_campaign=1_1) | Describe the processes used to decide which studies were eligible for each synthesis (such as tabulating the study intervention characteristics and comparing against the planned groups for each synthesis described in item 5. | Page 6-9 Table1,Table2 |
| [13b. Data preparation methods](https:/resources.equator-network.org/reporting-guidelines/prisma/items/synthesis-methods-data-preparation.html?utm_source=prisma&utm_medium=checklist&utm_campaign=1_1) | Describe any methods required to prepare the data for presentation or synthesis, such as handling of missing summary statistics, or data conversions. | Page 6-9 |
| [13c. Methods for tabulating or displaying results](https:/resources.equator-network.org/reporting-guidelines/prisma/items/synthesis-methods-tabulating-or-displaying-results.html?utm_source=prisma&utm_medium=checklist&utm_campaign=1_1) | Describe any methods used to tabulate or visually display results of individual studies and syntheses. | NA |
| [13d. Synthesis methods](https:/resources.equator-network.org/reporting-guidelines/prisma/items/synthesis-methods-synthesis-methods.html?utm_source=prisma&utm_medium=checklist&utm_campaign=1_1) | Describe any methods used to synthesize results and provide a rationale for the choice(s). If meta-analysis was performed, describe the model(s), method(s) to identify the presence and extent of statistical heterogeneity, and software package(s) used. | NA |
| [13e. Methods for exploring heterogeneity](https:/resources.equator-network.org/reporting-guidelines/prisma/items/synthesis-methods-exploring-heterogeneity.html?utm_source=prisma&utm_medium=checklist&utm_campaign=1_1) | Describe any methods used to explore possible causes of heterogeneity among study results (e.g. subgroup analysis, meta-regression). | NA |
| [13f. Sensitivity analyses](https:/resources.equator-network.org/reporting-guidelines/prisma/items/synthesis-methods-sensitivity-analyses.html?utm_source=prisma&utm_medium=checklist&utm_campaign=1_1) | Describe any sensitivity analyses conducted to assess robustness of the synthesized results. | NA |
| [14. Reporting bias ssessment](https:/resources.equator-network.org/reporting-guidelines/prisma/items/reporting-bias-assessment.html?utm_source=prisma&utm_medium=checklist&utm_campaign=1_1) | Describe any methods used to assess risk of bias due to missing results in a synthesis (arising from reporting biases). | Page 9, Materials and Methods, Assessment of Methodological Quality; Paragraph 1 |
| [15. Certainty assessment](https:/resources.equator-network.org/reporting-guidelines/prisma/items/certainty-assessment.html?utm_source=prisma&utm_medium=checklist&utm_campaign=1_1) | Describe any methods used to assess certainty (or confidence) in the body of evidence for an outcome. | NA |
| **Results** |  |  |
| 16. Study Selection |  |  |
| [16a. Results of the search and selection process](https:/resources.equator-network.org/reporting-guidelines/prisma/items/study-selection-search-results.html?utm_source=prisma&utm_medium=checklist&utm_campaign=1_1) | Describe the results of the search and selection process, from the number of records identified in the search to the number of studies included in the review, ideally using a flow diagram. | Page 9-10, Results, Study Selection ; Paragraph 1  Figure 2 |
| [16b. Excluded studies](https:/resources.equator-network.org/reporting-guidelines/prisma/items/study-selection-excluded-studies.html?utm_source=prisma&utm_medium=checklist&utm_campaign=1_1) | Cite studies that might appear to meet the inclusion criteria, but which were excluded, and explain why they were excluded. | Supplementary Materials,Appendix Table 3 |
| [17. Study characteristics](https:/resources.equator-network.org/reporting-guidelines/prisma/items/study-characteristics.html?utm_source=prisma&utm_medium=checklist&utm_campaign=1_1) | Cite each included study and present its characteristics. | Page 10-11, Results, Characteristics of Included Studies; Paragraph 1 |
| [18. Risk of bias in studies](https:/resources.equator-network.org/reporting-guidelines/prisma/items/risk-of-bias-in-studies.html?utm_source=prisma&utm_medium=checklist&utm_campaign=1_1) | Present assessments of risk of bias for each included study. | Page11, Results, Quality Evaluation Figure 1 |
| [19. Results of individual studies](https:/resources.equator-network.org/reporting-guidelines/prisma/items/results-of-individual-studies.html?utm_source=prisma&utm_medium=checklist&utm_campaign=1_1) | For all outcomes, present, for each study: (a) summary statistics for each group (where appropriate) and (b) an effect estimate and its precision (e.g. confidence/credible interval), ideally using structured tables or plots. | Page 15-17, Table 4 |
| 20. Results of Synthesis |  |  |
| [20a. Summary of studies](https:/resources.equator-network.org/reporting-guidelines/prisma/items/results-of-syntheses-summary-of-studies.html?utm_source=prisma&utm_medium=checklist&utm_campaign=1_1) | For each synthesis, briefly summarise the characteristics and risk of bias among contributing studies. | Page 11-17, Results,Quality Evaluation;  Types of Modalities Included;  Video Capture and Labeling;  Pain Assessment Scales Used for Ground Truth Labeling;  Identification of Pain Intensity Levels;  Handling of Missing Modalities;  Validation and Subgroup Analysis of Datasets;  Performance of Computerized Multimodal Pain Assessment |
| [20b. Statistical results](https:/resources.equator-network.org/reporting-guidelines/prisma/items/results-of-syntheses-statistical-results.html?utm_source=prisma&utm_medium=checklist&utm_campaign=1_1) | Present results of all statistical syntheses conducted. If meta-analysis was done, present for each the summary estimate and its precision (e.g. confidence/credible interval) and measures of statistical heterogeneity. If comparing groups, describe the direction of the effect. | NA |
| [20c. Heterogeneity](https:/resources.equator-network.org/reporting-guidelines/prisma/items/results-of-syntheses-heterogeneity.html?utm_source=prisma&utm_medium=checklist&utm_campaign=1_1) | Present results of all investigations of possible causes of heterogeneity among study results. | Page 11-17, Results,  Types of Modalities Included;  Video Capture and Labeling;  Pain Assessment Scales Used for Ground Truth Labeling;  Identification of Pain Intensity Levels;  Handling of Missing Modalities;  Validation and Subgroup Analysis of Datasets;  Performance of Computerized Multimodal Pain Assessment |
| [20d. Sensitivity analyses](https:/resources.equator-network.org/reporting-guidelines/prisma/items/results-of-syntheses-sensitivity-analyses.html?utm_source=prisma&utm_medium=checklist&utm_campaign=1_1) | Present results of all sensitivity analyses conducted to assess the robustness of the synthesized results. | NA |
| [21. Risk of reporting biases in syntheses](https:/resources.equator-network.org/reporting-guidelines/prisma/items/risk-of-reporting-biases-in-syntheses.html?utm_source=prisma&utm_medium=checklist&utm_campaign=1_1) | Present assessments of risk of bias due to missing results (arising from reporting biases) for each synthesis assessed. | NA |
| [22. Certainty of evidence](https:/resources.equator-network.org/reporting-guidelines/prisma/items/certainty-of-evidence.html?utm_source=prisma&utm_medium=checklist&utm_campaign=1_1) | Present assessments of certainty (or confidence) in the body of evidence for each outcome assessed. | NA |
| **Discussion** |  |  |
| 23. Discussion |  |  |
| [23a. General interpretation of the results](https:/resources.equator-network.org/reporting-guidelines/prisma/items/discussion-general-interpretation.html?utm_source=prisma&utm_medium=checklist&utm_campaign=1_1) | Provide a general interpretation of the results in the context of other evidence. | Page17-24, Discussion,  Superior Performance of Multimodal Approaches;  Optimal Modality Combinations;  Limitations of Single-Modality AI–Based Pain Assessment in Neonates;  Data Quality and Representativeness;  Ground Truth Standardization Issue;  Postoperative Pain Assessment and Missing Modality Handling;  Development and Clinical Translation of Multimodal Pain Assessment Systems |
| [23b. Limitations of included evidence](https:/resources.equator-network.org/reporting-guidelines/prisma/items/discussion-limitations-of-included-evidence.html?utm_source=prisma&utm_medium=checklist&utm_campaign=1_1) | Discuss any limitations of the evidence included in the review. | Page17-24, Discussion,  Superior Performance of Multimodal Approaches;  Optimal Modality Combinations;  Limitations of Single-Modality AI–Based Pain Assessment in Neonates;  Data Quality and Representativeness;  Ground Truth Standardization Issue;  Postoperative Pain Assessment and Missing Modality Handling;  Development and Clinical Translation of Multimodal Pain Assessment Systems. |
| [23c. Limitations of the review processes](https:/resources.equator-network.org/reporting-guidelines/prisma/items/discussion-limitations-of-review-process.html?utm_source=prisma&utm_medium=checklist&utm_campaign=1_1) | Discuss any limitations of the review processes used. | Page24,Limitations |
| [23d. Implications](https:/resources.equator-network.org/reporting-guidelines/prisma/items/discussion-implications.html?utm_source=prisma&utm_medium=checklist&utm_campaign=1_1) | Discuss implications of the results for practice, policy, and future research. | Page 25-26,  Conclusion;  Paragraph 1 -2 |
| **Other Information** |  |  |
| 24. Registration and Protocol |  |  |
| [24a. Registration](https:/resources.equator-network.org/reporting-guidelines/prisma/items/registration-and-protocol-registration.html?utm_source=prisma&utm_medium=checklist&utm_campaign=1_1) | Provide registration information for the review, including register name and registration number, or state that the review was not registered. | Page 6, Materials and Methods; Paragraph 1 |
| [24b. Protocol](https:/resources.equator-network.org/reporting-guidelines/prisma/items/registration-and-protocol-protocol.html?utm_source=prisma&utm_medium=checklist&utm_campaign=1_1) | Indicate where the review protocol can be accessed, or state that a protocol was not prepared. | Page 6, Materials and Methods; Paragraph 1 |
| [24c. Amendments](https:/resources.equator-network.org/reporting-guidelines/prisma/items/registration-and-protocol-amendments.html?utm_source=prisma&utm_medium=checklist&utm_campaign=1_1) | Describe and explain any amendments to information provided at registration or in the protocol. | NA |
| [25. Support](https:/resources.equator-network.org/reporting-guidelines/prisma/items/support.html?utm_source=prisma&utm_medium=checklist&utm_campaign=1_1) | Describe sources of financial or non-financial support for the review, and the role of the funders or sponsors in the review. | Page 27,Funding |
| [26.Competing Interests](https:/resources.equator-network.org/reporting-guidelines/prisma/items/competing-interests.html?utm_source=prisma&utm_medium=checklist&utm_campaign=1_1) | Declare any competing interests of review authors. | Page 27, Disclosure |
| [27. Availability of data, code, and other materials](https:/resources.equator-network.org/reporting-guidelines/prisma/items/availability-of-materials.html?utm_source=prisma&utm_medium=checklist&utm_campaign=1_1) | Report which of the following are publicly available and where they can be found: template data collection forms; data extracted from included studies; data used for all analyses; analytic code; any other materials used in the review. | Page 27, Data Availability Statement |

**Appendix 2 Search Strategy**

**The search date ends on September 12, 2025**

| **Pubmed** | |
| --- | --- |
| #1 | "Infant, Newborn"[Mesh] |
| #2 | ("Infants Newborn"[Title/Abstract]) OR ("Newborn*"[Title/Abstract]) OR ("Neonat*"[Title/Abstract]) OR( "Premature"[Title/Abstract] ) OR ( " Postmature"  [Title/Abstract] ) OR ("low birth weight infant"[Title/Abstract]) |
| #3 | #1 OR #2 |
| #4 | ("Pain"[Mesh]) OR ("Pain Measurement"[Mesh]) OR ("Pain Management"[Mesh]) |
| #5 | Pain[Title/Abstract] OR Postoperative pain* [Title/Abstract]) OR ( Postsurgical Pain[Title/Abstract]) OR (Pain Measurement*[Title/Abstract]) OR ( Pain Management*[Title/Abstract] ) OR ( Pain Assessment*[Title/Abstract] ) OR (Acute Pain* [Title/Abstract]) OR ( Chronic Pain*[Title/Abstract]) |
| #6 | #4 OR #5 |
| #7 | ("Multimodal Imaging"[Mesh]) OR ("Machine Learning"[Mesh]) OR ("Artificial Intelligence"[Mesh]) OR ("Facial Expression"[Mesh]) |
| #8 | Hybrid Imaging[Title/Abstract] OR Facial Expression[Title/Abstract] OR Facial Expressions[Title/Abstract] OR Transfer Learning[Title/Abstract] OR Deep Learning[Title/Abstract] OR Computational Intelligence[Title/Abstract] OR Neural Network Model[Title/Abstract] OR Body movement[Title/Abstract] OR Crying sound[Title/Abstract] |
| #9 | #7 OR #8 |
| #10 | #3 AND #6 AND #9 |
| **Web of science** | |
| #1 | TI=(Infants Newborn OR Newborn* OR Neonate* OR Premature OR Post-mature OR low birth weight infant) |
| #2 | TI=(Pain* OR Postoperative pain* OR Postsurgical Pain OR Pain Measurement*OR Pain Managements* OR Pain Assessment* OR Acute Pain* OR Chronic Pain*) |
| #3 | AB=(Multimodal Imaging OR Multimodal OR Muti-modal OR Hybrid Imaging OR Artificial Intelligence OR Facial Expression OR Facial Expressions OR Face Expression OR Learning OR Deep learning OR Computational Intelligence OR Neural Network Model OR Body movement OR Crying sound) |
| #4 | # 1 AND #2 AND #3 |
| **Embase（Medline）** | |
| #1 | ('newborn'/exp OR 'newborn') AND ([embase]/lim OR [medline]/lim) |
| #2 | ('full term infant':ti,ab,kw OR 'human newborn':ti,ab,kw OR 'infant, newborn':ti,ab,kw OR 'neonate':ti,ab,kw OR 'neonatus':ti,ab,kw OR 'newborn baby':ti,ab,kw OR 'newborn infant':ti,ab,kw OR 'newly born baby':ti,ab,kw OR 'newly born infant':ti,ab,kw OR 'newborn':ti,ab,kw) AND ([embase]/lim OR [medline]/lim) |
| #3 | #1OR #2 |
| #4 | ('pain'/exp OR 'pain') OR ('pain assessment'/exp OR 'pain assessment'）OR ('pain measurement'/exp OR 'pain measurement') OR ('postoperative pain'/exp OR 'postoperative pain') AND ([embase]/lim OR [medline]/lim) |
| #5 | ('acute pain':ti,ab,kw OR 'pain evaluation':ti,ab,kw OR 'post operation pain':ti,ab,kw OR 'post-surgery pain':ti,ab,kw OR 'post-surgical pain':ti,ab,kw OR 'postoperation pain':ti,ab,kw OR 'postsurgery pain':ti,ab,kw OR 'postsurgical pain':ti,ab,kw) AND ([embase]/lim OR [medline]/lim) |
| #6 | #4 OR #5 |
| #7 | ('multimodal imaging'/exp OR 'multimodal imaging') OR ('artificial intelligence'/exp OR 'artificial intelligence') OR ('machine learning'/exp OR 'machine learning') OR ('facial expression'/exp OR 'facial expression') OR ('body movement'/exp OR 'body movement')  AND ([embase]/lim OR [medline]/lim) |
| #8 | ('multi modal imaging':ti,ab,kw OR 'machine intelligence':ti,ab,kw OR 'expression facial':ti,ab,kw OR 'face expression':ti,ab,kw OR 'body motility':ti,ab,kw OR 'body motion':ti,ab,kw OR 'learning machine':ti,ab,kw OR 'learning machines':ti,ab,kw) AND ([embase]/lim OR [medline]/lim) |
| #9 | #7 OR #8 |
| #10 | #3 AND #6 AND #9 |
| **Cochrane** | |
| #1 | MeSH descriptor: [Infant, Newborn] |
| #2 | (Infants Newborn OR Newborn* OR Neonat* OR Premature OR Postmature OR low birth weight infant):ti,ab,kw |
| #3 | 1# OR 2# |
| #4 | MeSH descriptor: [Pain] OR MeSH descriptor: [Pain Measurement] OR  MeSH descriptor: [Pain Management] |
| #5 | ( Postoperative pain* OR Postsurgical Pain OR Pain Measurements OR Pain Managements OR Pain Assessment* OR Acute Pain* ):ti,ab,kw |
| #6 | #4 OR #5 |
| #7 | MeSH descriptor: [Multimodal Imaging] OR MeSH descriptor: [Machine Learning]OR MeSH descriptor:[Artificial Intelligence] OR MeSH descriptor: [Facial Expression] OR MeSH descriptor:[Automated Facial Recognition] |
| #8 | (Hybrid Imaging OR Transfer Learning OR Computational Intelligence OR Reasoning Computer OR AI OR Machine Intelligence OR Computer Reasoning OR Facial Expression* OR Face Expression* OR Identity Recognition Facial OR Multimodel OR Body movement OR Crying sound):ti,ab,kw |
| #9 | #7 OR #8 |
| #10 | #3 AND #6 AND #9 |

| **Appendix 3** Reasons for excluding the literature after reading the full text | | | | | |
| --- | --- | --- | --- | --- | --- |
| No | Title | reasons for exclusion | | | |
| only about single mode | not in image or video format | What modes are not explicitly described | other |
| 1 | A Quantitative Examination of Extreme Facial Pain Expression in Neonates: The Primal Face of Pain across Time1 | √(Face expression) | / | / | / |
| 2 | Artificial Intelligence Based Pain Assessment Technology in Clinical Application of Real-World Neonatal Blood Sampling2 | √(Face expression) | / | / | / |
| 3 | Automatic and Continuous Discomfort Detection for Premature Infants in a NICU Using Video-Based Motion Analysis3 | √(Motion Analysis) | / | / | Although pain is briefly mentioned at the end of the article, the focus is primarily on the concepts of comfort and discomfort. |
| 4 | Automatic Infants’ Pain Assessment by Dynamic Facial Representation: Effects of Profile View,Gestational Age, Gender, and Race4 | √(Dynamic Facial Representation) | / | / | / |
| 5 | Comparative analysis of artificial intelligence and expert assessments in detecting neonatal procedural pain5 | √(Face expression) | / | / | / |
| 6 | Decoding of pain during heel lancing in human neonates with EEG signal and machine learning approach6 | √(EEG) | / | / | / |
| 7 | Defining and distinguishing infant behavioral states using acoustic cry analysis: is colic painful?7 | √(Crying sound) | / | / | / |
| 8 | Face-based automatic pain assessment: challenges and perspectives in neonatal intensive care units8 | √(Face expression) | / | / | This is a literature review on automated neonatal pain assessment utilizing facial expression recognition. |
| 9 | Full‑convolution Siamese network algorithm under deep learning used in tracking of facial video image in newborns9 | √(Face expression) | / | / | / |
| 10 | Improved binary dragonfly optimization algorithm and wavelet packet based non-linear features for infant cry classification10 | √(Crying sound) | / | / | / |
| 11 | Machine recognition and representation of neonatal facial displays of acute pain11 | √(Face expression) | / | / | / |
| 12 | Mapping Cortical Responses to Somatosensory Stimuli in Human Infants with Simultaneous Near-Infrared Spectroscopy and Event-Related Potential Recording12 | / | √ | / | / |
| 13 | Multi-modal pain measurements in infants13 | / | / | / | There was no description of the sample size and basic information of the people included in the study. Additionally, the pain assessment scale used to evaluate and label the video clips was not introduced. |
| 14 | Pediatricians’ focus of sight at pain assessment during a neonatal heel puncture14 | / | √ | √ | / |
| 15 | A Machine Learning Approach to Classify Biomedical Acoustic Features for Baby Cries15 | √(Crying sound) | / | / | / |
| 16 | A Video Database of Neonatal Facial Expression based on Painful Clinical Procedures16 | √(Face expression) | / | / | / |
| 17 | Sparse Representation Based Facial Expression Classification for Pain Assessment in Neonates17 | √(Face expression) | / | / | / |
| 18 | Pose-invariant and occlusion-robust neonatal facial pain assessment18 | √(Face expression) | / | / | / |
| 19 | Neonatal procedural pain can be assessed by computer software that has good sensitivity and specificity to detect facial movements19 | √(Face expression) | / | / | / |
| 20 | Neonatal pain assessment: A Kendall analysis between clinical and visually perceived facial features20 | √(Face expression) | / | / | / |
| 21 | Neonatal Face and Facial Landmark Detection from Video Recordings21 | √(Face and facial landmark detection) | / | / | / |
| 22 | Measuring Pain in Neonates and Young Infants22 | / | √ | √ | / |
| 23 | Human vs machine towards neonatal pain assessment: A comprehensive analysis ofthe facial features extracted by health professionals, parents, and convolutional neural networks23 | √(Face expression) | / | / | / |
| 24 | Automatic detection of the expiratory and inspiratory phases in newborn cry signals24 | √(Crying sound) | / | / | / |
| 25 | Automated Newborn Pain Assessment Framework Using Computer Vision Techniques25 | √(Face expression) | / | / | / |
| 26 | Audio Feature Analysis for Acoustic Pain Detection in Term Newborns26 | √(Crying sound) | / | / | Audio Feature Analysis |
| 27 | Video-Based versus On-Site Neonatal Pain Assessment in Neonatal Intensive Care Units: The Impact of Video-Based Neonatal Pain Assessment in Real-World Scenario on Pain Diagnosis and Its Artificial Intelligence Application27 | / | / | / | Only the difference between manual assessment and re-assessment after video recording was examined; the AI-NPA neonatal pain assessment was not established. |
| 28 | Assessing procedural pain in infants: a feasibility study evaluating a point-of-care mobile solution based on automated facial analysis28 | / | / | / | The study population was infants over 2 months old. |
| 29 | Deep Learning Assisted Neonatal Cry Classification via Support Vector Machine Models29 | √(Crying sound) | / | / | / |
| 30 | Future roles of artificial intelligence in early pain management of newborns30 | / | √ | / | Literature review |
| 31 | Evaluating neonatal pain via fusing vision transformer and concept-cognitive computing31 | √(Face expression) | / | / | / |
| 32 | Performance Evaluation of a Supervised Machine Learning Pain Classification Model Developed by Neonatal Nurses32 | √(Face expression) | / | / | / |
| 33 | EEG, behavioural and physiological recordings following a painful procedure in human neonates33 | / | / | / | The gestational age of the population included in this study ranged from 29 to 47 weeks, which did not meet our inclusion criteria for sodium-related outcomes. |
| 34 | A Deep Learning Approach for Infant Pain Assessment Using Facial Expressions Through Convolutional Neural Network34 | √(Face expression) | / | / | / |
| 35 | Objective Detection of Newborn Infant Acute Procedural Pain Using EEG and Machine Learning Algorithms35 | √(EEG) | / | / | / |
| 36 | Touchless monitoring of neonatal activity: a multi-center study36 | / | / | / | Quantitative and continuous monitoring of neonatal activity through non-contact video-based monitoring methods. |
| 37 | Disclosing neonatal pain in real-time: AI-derived pain sign from continuous assessment of facial expressions37 | √(Face expression) | / | / | / |
| 38 | Behavioral and Physiological Signs for Pain Assessment in Preterm and Term Neonates During a Nociception-Speciﬁc Response: A Systematic Review38 | / | / | / | It is highly relevant to this study, so we read the full text, although it is only a systematic review. |
| 39 | Automated Newborn Pain Assessment Framework Using Computer Vision Techniques39 | √(Face expression) | / | / | / |
| 40 | Multimodal neonatal procedural and postoperative pain assessment datase40 | / | / | / | Only the database was established, but the performance of this multimodal pain assessment was not reported, and there were no outcome indicators. |
| 41 | Quantitative and continuous monitoring of neonatal activity through non-contact video capture monitoring methods.41 | / | / | / | Full text is not available. |
| 42a | Machine assessment of neonatal facial expressions of acute pain42 | √(Face expression) | / | / | / |
| 43a | Neonatal facial pain assessment combining hand-crafted and deep features43 | √(Face expression) | / | / | / |
| 44a | Relevance Vector Machine Learning for Neonate Pain Intensity Assessment Using Digital Imaging44 | √(Face expression) | / | / | / |
| 45a | Automated System For Detecting Pain In Neonates From Videos45 | √(Face expression) | / | / | / |
| 46a | Harnessing the power of deep learning methods in healthcare: Neonatal pain assessment from crying sound46 | √(Crying sound) | / | / | / |
| 47a | [Convolutional Neural Networks for Neonatal Pain Assessment](https://ieeexplore.ieee.org/abstract/document/8723168)47 | / | / | / | Full text is not available. |

**Notes:** a represents the literature retrieved through citation search. √ represents mention. / Indicates that the study doesn't mention or is unclear.

**List of excluded studies**

1. Schiavenato M, von Baeyer CL. A Quantitative Examination of Extreme Facial Pain Expression in Neonates: The Primal Face of Pain across Time. Pain Res Treat. 2012; 2012: 251625.
2. Cheng X, Zhu H, Mei L, et al. Artificial Intelligence Based Pain Assessment Technology in Clinical Application of Real-World Neonatal Blood Sampling. Diagnostics. 2022; 12.
3. Sun Y, de With PHN, Kommers D, et al. Automatic and Continuous Discomfort Detection for Premature Infants in a NICU Using Video-Based Motion Analysis. Annu Int Conf IEEE Eng Med Biol Soc. 2019; 2019: 5995-5999.
4. Zhi R, Goldgof G Z D, Ashmeade T, et al. Automatic infants’ pain assessment by dynamic facial representation: effects of profile view, gestational age, gender, and race[J]. Journal of clinical medicine, 2018, 7(7): 173.
5. Giordano V, Luister A, Vettorazzi E, et al. Comparative analysis of artificial intelligence and expert assessments in detecting neonatal procedural pain[J]. Scientific Reports, 2024, 14(1): 20374.
6. Shafiee R, Daliri M R. Decoding of pain during heel lancing in human neonates with EEG signal and machine learning approach[J]. Scientific Reports, 2024, 14(1): 31244.
7. Parga J J, Lewin S, Lewis J, et al. Defining and distinguishing infant behavioral states using acoustic cry analysis: is colic painful?[J]. Pediatric research, 2020, 87(3): 576-580.
8. Heiderich T M, Carlini L P, Buzuti L F, et al. Face-based automatic pain assessment: challenges and perspectives in neonatal intensive care units[J]. Jornal de Pediatria, 2023, 99(6): 546-560.
9. Wang Y, Huang L, Yee A L. Full-convolution Siamese network algorithm under deep learning used in tracking of facial video image in newborns[J]. The Journal of Supercomputing, 2022, 78(12): 14343-14361.
10. Hariharan M, Sindhu R, Vijean V, et al. Improved binary dragonfly optimization algorithm and wavelet packet based non-linear features for infant cry classification[J]. Computer Methods and Programs in Biomedicine, 2018, 155: 39-51.
11. Brahnam S, Chuang C F, Shih F Y, et al. Machine recognition and representation of neonatal facial displays of acute pain[J]. Artificial intelligence in medicine, 2006, 36(3): 211-222.
12. Verriotis M, Fabrizi L, Lee A, et al. Mapping cortical responses to somatosensory stimuli in human infants with simultaneous near-infrared spectroscopy and event-related potential recording[J]. ENeuro, 2016, 3(2).
13. Worley A, Fabrizi L, Boyd S, et al. Multi-modal pain measurements in infants. J Neurosci Methods. 2012;205(2):252-257. doi:10.1016/j.jneumeth.2012.01.009
14. Silva ES, Barros MCM, Borten JBL, et al. Pediatricians' focus of sight at pain assessment during a neonatal heel puncture. Rev Paul Pediatr. 2023;42:e2023089. Published 2023 Dec 11. doi:10.1590/1984-0462/2024/42/2023089
15. Aggarwal G, Jhajharia K, Izhar J, et al. A Machine Learning Approach to Classify Biomedical Acoustic Features for Baby Cries. J Voice. 2025;39(6):1446-1455. doi:10.1016/j.jvoice.2023.06.014
16. Chen S, Luo F, Chen X, et al. A Video Database of Neonatal Facial Expression based on Painful Clinical Procedures. Annu Int Conf IEEE Eng Med Biol Soc. 2019;2019:6565-6568. doi:10.1109/EMBC.2019.8857723
17. Lu G, Yang C, Chen M, et al. Sparse representation based facial expression classification for pain assessment in neonates[C]//2016 12th International Conference on Natural Computation, Fuzzy Systems and Knowledge Discovery (ICNC-FSKD). IEEE, 2016: 1615-1619.
18. Zhao Y, Zhu H, Chen X, et al. Pose-invariant and occlusion-robust neonatal facial pain assessment[J]. Computers in Biology and Medicine, 2023, 165: 107462.
19. Heiderich T M, Leslie A T F S, Guinsburg R. Neonatal procedural pain can be assessed by computer software that has good sensitivity and specificity to detect facial movements[J]. Acta Paediatrica, 2015, 104(2): e63-e69.
20. Tamanaka F G, Carlini L P, Heiderich T M, et al. Neonatal pain assessment: A Kendall analysis between clinical and visually perceived facial features[J]. Computer Methods in Biomechanics and Biomedical Engineering: Imaging & Visualization, 2023, 11(3): 331-340.
21. Grooby E, Sitaula C, Ahani S, et al. Neonatal face and facial landmark detection from video recordings[C]//2023 45th Annual International Conference of the IEEE Engineering in Medicine & Biology Society (EMBC). IEEE, 2023: 1-5.
22. Chawla D. Measuring Pain in Neonates and Young Infants. Indian J Pediatr. 2024;91(9):881-882. doi:10.1007/s12098-024-05204-z
23. Carlini LP, Coutrin GAS, Ferreira LA, et al. Human vs machine towards neonatal pain assessment: A comprehensive analysis of the facial features extracted by health professionals, parents, and convolutional neural networks. Artif Intell Med. 2024;147:102724. doi:10.1016/j.artmed.2023.102724
24. Abou-Abbas L, Tadj C, Gargour C, et al. Expiratory and Inspiratory Cries Detection Using Different Signals' Decomposition Techniques. J Voice. 2017;31(2):259.e13-259.e28. doi:10.1016/j.jvoice.2016.05.015
25. Parodi E, Melis D, Boulard L, et al. Automated newborn pain assessment framework using computer vision techniques[C]//Proceedings of the 4th International Conference on bioinformatics research and applications. 2017: 31-36.
26. Giordano V, Luister A, Reuter C, et al. Audio Feature Analysis for Acoustic Pain Detection in Term Newborns. Neonatology. 2022;119(6):760-768. doi:10.1159/000526209
27. Chen X, Zhu H, Mei L, et al. Video-Based versus On-Site Neonatal Pain Assessment in Neonatal Intensive Care Units: The Impact of Video-Based Neonatal Pain Assessment in Real-World Scenario on Pain Diagnosis and Its Artificial Intelligence Application. Diagnostics (Basel). 2023;13(16):2661. Published 2023 Aug 12. doi:10.3390/diagnostics13162661
28. Hoti K, Chivers PT, Hughes JD. Assessing procedural pain in infants: a feasibility study evaluating a point-of-care mobile solution based on automated facial analysis. Lancet Digit Health. 2021;3(10):e623-e634. doi:10.1016/S2589-7500(21)00129-1
29. K A, Vincent PMDR, Srinivasan K, et al. Deep Learning Assisted Neonatal Cry Classification via Support Vector Machine Models. Front Public Health. 2021;9:670352. Published 2021 Jun 10. doi:10.3389/fpubh.2021.670352
30. Salekin MS, Mouton PR, Zamzmi G, et al. Future roles of artificial intelligence in early pain management of newborns. Paediatr Neonatal Pain. 2021;3(3):134-145. Published 2021 Aug 5. doi:10.1002/pne2.12060
31. Lin J, Zhang L, Xia J, Zhang Y. Evaluating neonatal pain via fusing vision transformer and concept-cognitive computing. Sci Rep. 2024;14(1):26201. Published 2024 Oct 31. doi:10.1038/s41598-024-77521-4
32. Manworren RCB, Horner S, Joseph R, et al. Kaduwela N. Performance Evaluation of a Supervised Machine Learning Pain Classification Model Developed by Neonatal Nurses. Adv Neonatal Care. 2024;24(3):301-310. doi:10.1097/ANC.0000000000001145
33. Jones L, Laudiano-Dray MP, Whitehead K, et al. EEG, behavioural and physiological recordings following a painful procedure in human neonates. Sci Data. 2018;5:180248. Published 2018 Nov 13. doi:10.1038/sdata.2018.248
34. Zhang L, Zhu TY, Zhang Y. A Deep Learning Approach for Infant Pain Assessment Using Facial Expressions Through Convolutional Neural Network. Comput Inform Nurs. 2025;43(7):e01302. Published 2025 Jul 1. doi:10.1097/CIN.0000000000001302
35. Roué JM, Avnit A, Gholami B, et al. Objective Detection of Newborn Infant Acute Procedural Pain Using EEG and Machine Learning Algorithms. Paediatr Neonatal Pain. 2025;7(1):e70001. Published 2025 Mar 10. doi:10.1002/pne2.70001
36. Addison PS, Gunturi M, Montgomery D, et al. Touchless monitoring of neonatal activity: a multi-center study. Pediatr Res. Published online July 24, 2025. doi:10.1038/s41390-025-04294-5
37. Ferreira LA, Carlini LP, Coutrin GAS, et al. Disclosing neonatal pain in real-time: AI-derived pain sign from continuous assessment of facial expressions. Comput Biol Med. 2025;189:109908. doi:10.1016/j.compbiomed.2025.109908
38. Relland LM, Gehred A, Maitre NL. Behavioral and Physiological Signs for Pain Assessment in Preterm and Term Neonates During a Nociception-Specific Response: A Systematic Review. Pediatr Neurol. 2019;90:13-23. doi:10.1016/j.pediatrneurol.2018.10.001
39. Parodi E, Melis D, Boulard L, et al. Automated newborn pain assessment framework using computer vision techniques[C]//Proceedings of the 4th International Conference on bioinformatics research and applications. 2017: 31-36.
40. Salekin MS, Zamzmi G, Hausmann J, et al. Multimodal neonatal procedural and postoperative pain assessment dataset. Data Brief. 2021;35:106796. Published 2021 Jan 26. doi:10.1016/j.dib.2021.106796
41. Addison P S, Gerstmann D, Clemmer J, et al. Continuous non-contact monitoring of neonatal activity[J]. BMC pediatrics, 2025, 25(1): 1-11.
42. Brahnam S, Chuang CF, Shih FY, et al. Machine recognition and representation of neonatal facial displays of acute pain. Artif Intell Med. 2006;36(3):211-222. doi:10.1016/j.artmed.2004.12.003
43. Celona L, Manoni L. Neonatal facial pain assessment combining hand-crafted and deep features[C]//International Conference on Image Analysis and Processing. Cham: Springer International Publishing, 2017: 197-204.
44. Gholami B, Haddad WM, Tannenbaum AR. Relevance vector machine learning for neonate pain intensity assessment using digital imaging. IEEE Trans Biomed Eng. 2010;57(6):1457-1466. doi:10.1109/TBME.2009.2039214
45. Olmi B, Manfredi C, Frassineti L, et al. Aggregate Channel Features for newborn face detection in Neonatal Intensive Care Units. Annu Int Conf IEEE Eng Med Biol Soc. 2022;2022:455-458. doi:10.1109/EMBC48229.2022.9871399
46. Sirajus Salekin M, Zamzmi G, Paul R, et al. Harnessing the Power of Deep Learning Methods in Healthcare: Neonatal Pain Assessment from Crying Sound[J]. arXiv e-prints, 2019: arXiv: 1909.02543.
47. Carlini LP, Coutrin GAS, Ferreira LA, et al. Human vs machine towards neonatal pain assessment: A comprehensive analysis of the facial features extracted by health professionals, parents, and convolutional neural networks. Artif Intell Med. 2024;147:102724. doi:10.1016/j.artmed.2023.102724
